# Supplementary material
Source: MDPI journal article supplement (https://www.mdpi.com/2304-6732/1/4/412)
Supplement: s1 [file s1]

Supplementary Information

## Fibre Coupled Photonic Crystal Cavity Arrays on Transparent Substrates for Spatially Resolved Sensing. *Photonics* 2014, 1, 412-420

Mark G. Scullion \*, Matthias Fischer and Thomas F. Krauss

Department of Physics, University of York, York, YO10 5DD, UK,

E-Mails: matthias.fischer@york.ac.uk (M.F.); thomas.krauss@york.ac.uk (T.F.K.)

\* Author to whom correspondence should be addressed; E-Mail: mark.scullion@york.ac.uk;  
Tel.: +44(0)-1904-322-701.

### Supplementary Figures

**Supplementary Figure 1.** Cavity response in air versus water.

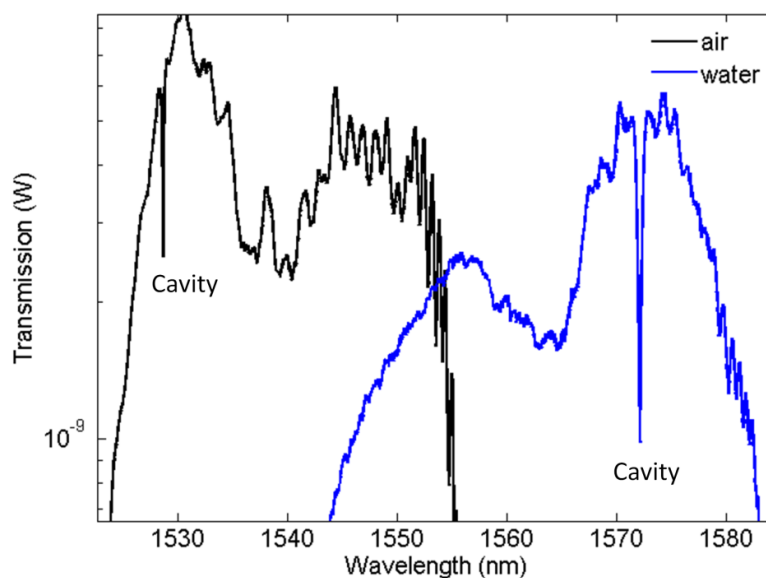

**Supplementary Figure 2.** Cavity response for 864 nm particle in cavity.

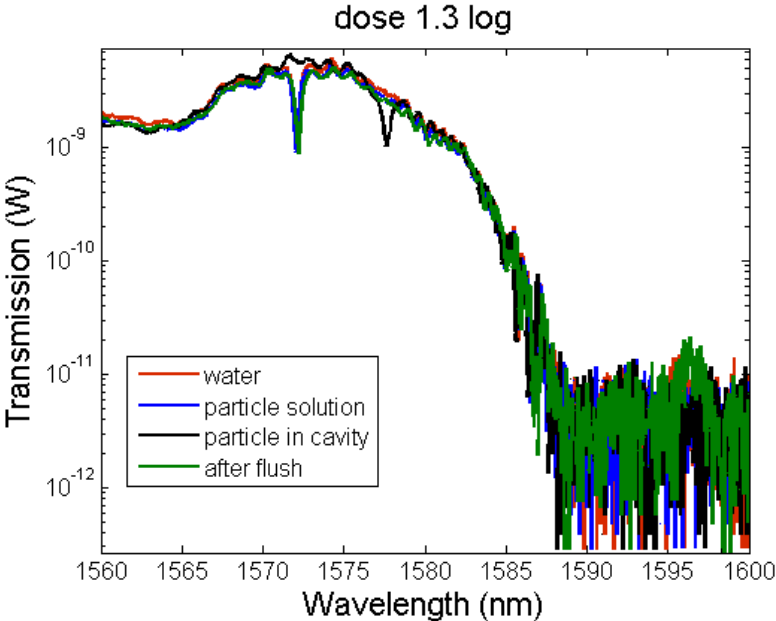

© 2014 by the authors; licensee MDPI, Basel, Switzerland. This article is an open access article distributed under the terms and conditions of the Creative Commons Attribution license (<http://creativecommons.org/licenses/by/4.0/>).
